# Supplementary material for: Genotoxic risk of quinocetone and its possible mechanism in in vitro studies
Source: Royal Society of Chemistry journal article supplement (doi:10.1039/c5tx00341e), 2015-11-25
Supplement: c5tx00341e1.pdf [file c5tx00341e1.pdf]

1 **Table S1** Reaction system of quinocetone in gel electrophoresis under aerobic  
2 conditions

| Content                            | 1  | 2    | 3   | 4   | 5   | 6   | 7   | 8   | 9   | 10  |
|------------------------------------|----|------|-----|-----|-----|-----|-----|-----|-----|-----|
| DNA ( $\mu\text{L}$ )              | 2  | 2    | 2   | 2   | 2   | 2   | 2   | 2   | 2   | 2   |
| X ( $\mu\text{L}$ )                | -  | 2    | 2   | 2   | 2   | 2   | 2   | 2   | 2   | 2   |
| XO ( $\mu\text{L}$ )               | -  | 3.5  | 3.5 | 3.5 | 3.5 | 3.5 | 3.5 | 3.5 | 3.5 | 3.5 |
| QCT ( $\mu\text{L}$ )              | -  | -    | -   | 4   | 4   | 4   | -   | -   | -   | -   |
| TPZ ( $\mu\text{L}$ )              | -  | -    | 2   | -   | -   | -   | -   | -   | 2   | 2   |
| SOD ( $\mu\text{L}$ )              | -  | -    | -   | -   | -   | 5   | 5   | -   | 5   | -   |
| DMSO ( $\mu\text{L}$ )             | -  | -    | -   | -   | 4   | -   | -   | 4   | -   | 4   |
| Tris ( $\mu\text{L}$ )             | 2  | 2    | 2   | 2   | 2   | 2   | 2   | 2   | 2   | 2   |
| H <sub>2</sub> O ( $\mu\text{L}$ ) | 16 | 10.5 | 8.5 | 6.5 | 2.5 | 1.5 | 5.5 | 6.5 | 3.5 | 4.5 |
| Total ( $\mu\text{L}$ )            | 20 | 20   | 20  | 20  | 20  | 20  | 20  | 20  | 20  | 20  |

3 *Note:* X, xanthine; XO, xanthine oxidase; QCT, quinocetone; TPZ, tirapazamine;  
4 DMSO, dimethyl sulfoxide

5

6

7

8

9

11 **Table S2** Reaction system of quinocetone in gel electrophoresis in low oxygen  
 12 condition

| Content                            | 1  | 2    | 3   | 4   | 5   | 6   | 7   | 8   | 9  | 10  |
|------------------------------------|----|------|-----|-----|-----|-----|-----|-----|----|-----|
| DNA ( $\mu\text{L}$ )              | 2  | 2    | 2   | 2   | 2   | 2   | 2   | 2   | 2  | 2   |
| X ( $\mu\text{L}$ )                | -  | 2    | 2   | 2   | 2   | 2   | 2   | 2   | -  | 2   |
| XO ( $\mu\text{L}$ )               | -  | 3.5  | 3.5 | 3.5 | 3.5 | 3.5 | 3.5 | 3.5 | -  | 3.5 |
| QCT ( $\mu\text{L}$ )              | -  | -    | -   | -   | -   | -   | 2   | 2   | 2  | 2   |
| TPZ ( $\mu\text{L}$ )              | -  | -    | -   | -   | 2   | 2   | -   | -   | -  | -   |
| SOD ( $\mu\text{L}$ )              | -  | -    | 5   | -   | -   | -   | -   | -   | -  | 5   |
| DMSO ( $\mu\text{L}$ )             | -  | -    | -   | 4   | -   | 4   | -   | 4   | -  | -   |
| Tris ( $\mu\text{L}$ )             | 2  | 2    | 2   | 2   | 2   | 2   | 2   | 2   | 2  | 2   |
| H <sub>2</sub> O ( $\mu\text{L}$ ) | 16 | 10.5 | 5.5 | 6.5 | 8.5 | 4.5 | 8.5 | 4.5 | 14 | 3.5 |
| Total ( $\mu\text{L}$ )            | 20 | 20   | 20  | 20  | 20  | 20  | 20  | 20  | 20 | 20  |

13 *Note:* X, xanthine; XO, xanthine oxidase; QCT, quinocetone; TPZ, tirapazamine;

14 DMSO, dimethyl sulfoxide

15
